# Supplementary material
Source: Springer Nature journal article supplement (https://www.springermedizin.de/resource/supplementary/12955_2007_396_MOESM1_ESM.pdf/9560308)

8-11 years 12-18 years

KIDSCREEN subscales

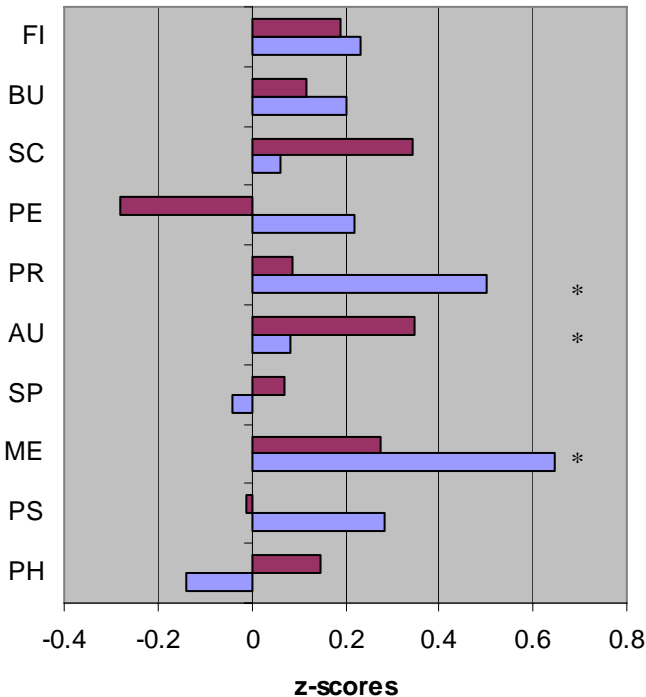

Supplement: MOESM1 [file 9560308]
